# Supplementary material for: Expansion of structural and functional diversities of DNA using new 5-substituted deoxyuridine derivatives by PCR with superthermophilic KOD Dash DNA polymeraseElectronic supplementary information (ESI) available: sequencing of the PCR products (108mer DNA) from substrates 1 and 2. See http://www.rsc.org/suppdata/cc/b1/b107838k/
Source: Royal Society of Chemistry journal article supplement (doi:10.1039/b107838k), 2001-11-14

Supplementary data of the sequence of the PCR products (108mer DNA) from substrate **1** and **2**.

Sequencing of the modified DNAs was carried out using a Thermo sequenase radiolabelled terminator cycle sequencing kitTM (Amersham) according to the supplier’s protocol. DNA **B** (24mer) was used as a primer for the sequencing.

The sequence of the both modified DNAs was 5’-GCC AAG CTT GCA TGC CTG CAGGTC GAC TCT AGA GGA TCC CCG GGT ACC GAG CTC GAA TTC (GTA ATC ATG ATC ATA GCT GTT TC---)-3’ . The sequence corresponding to the primer **A** region is shown in the parenthesis.


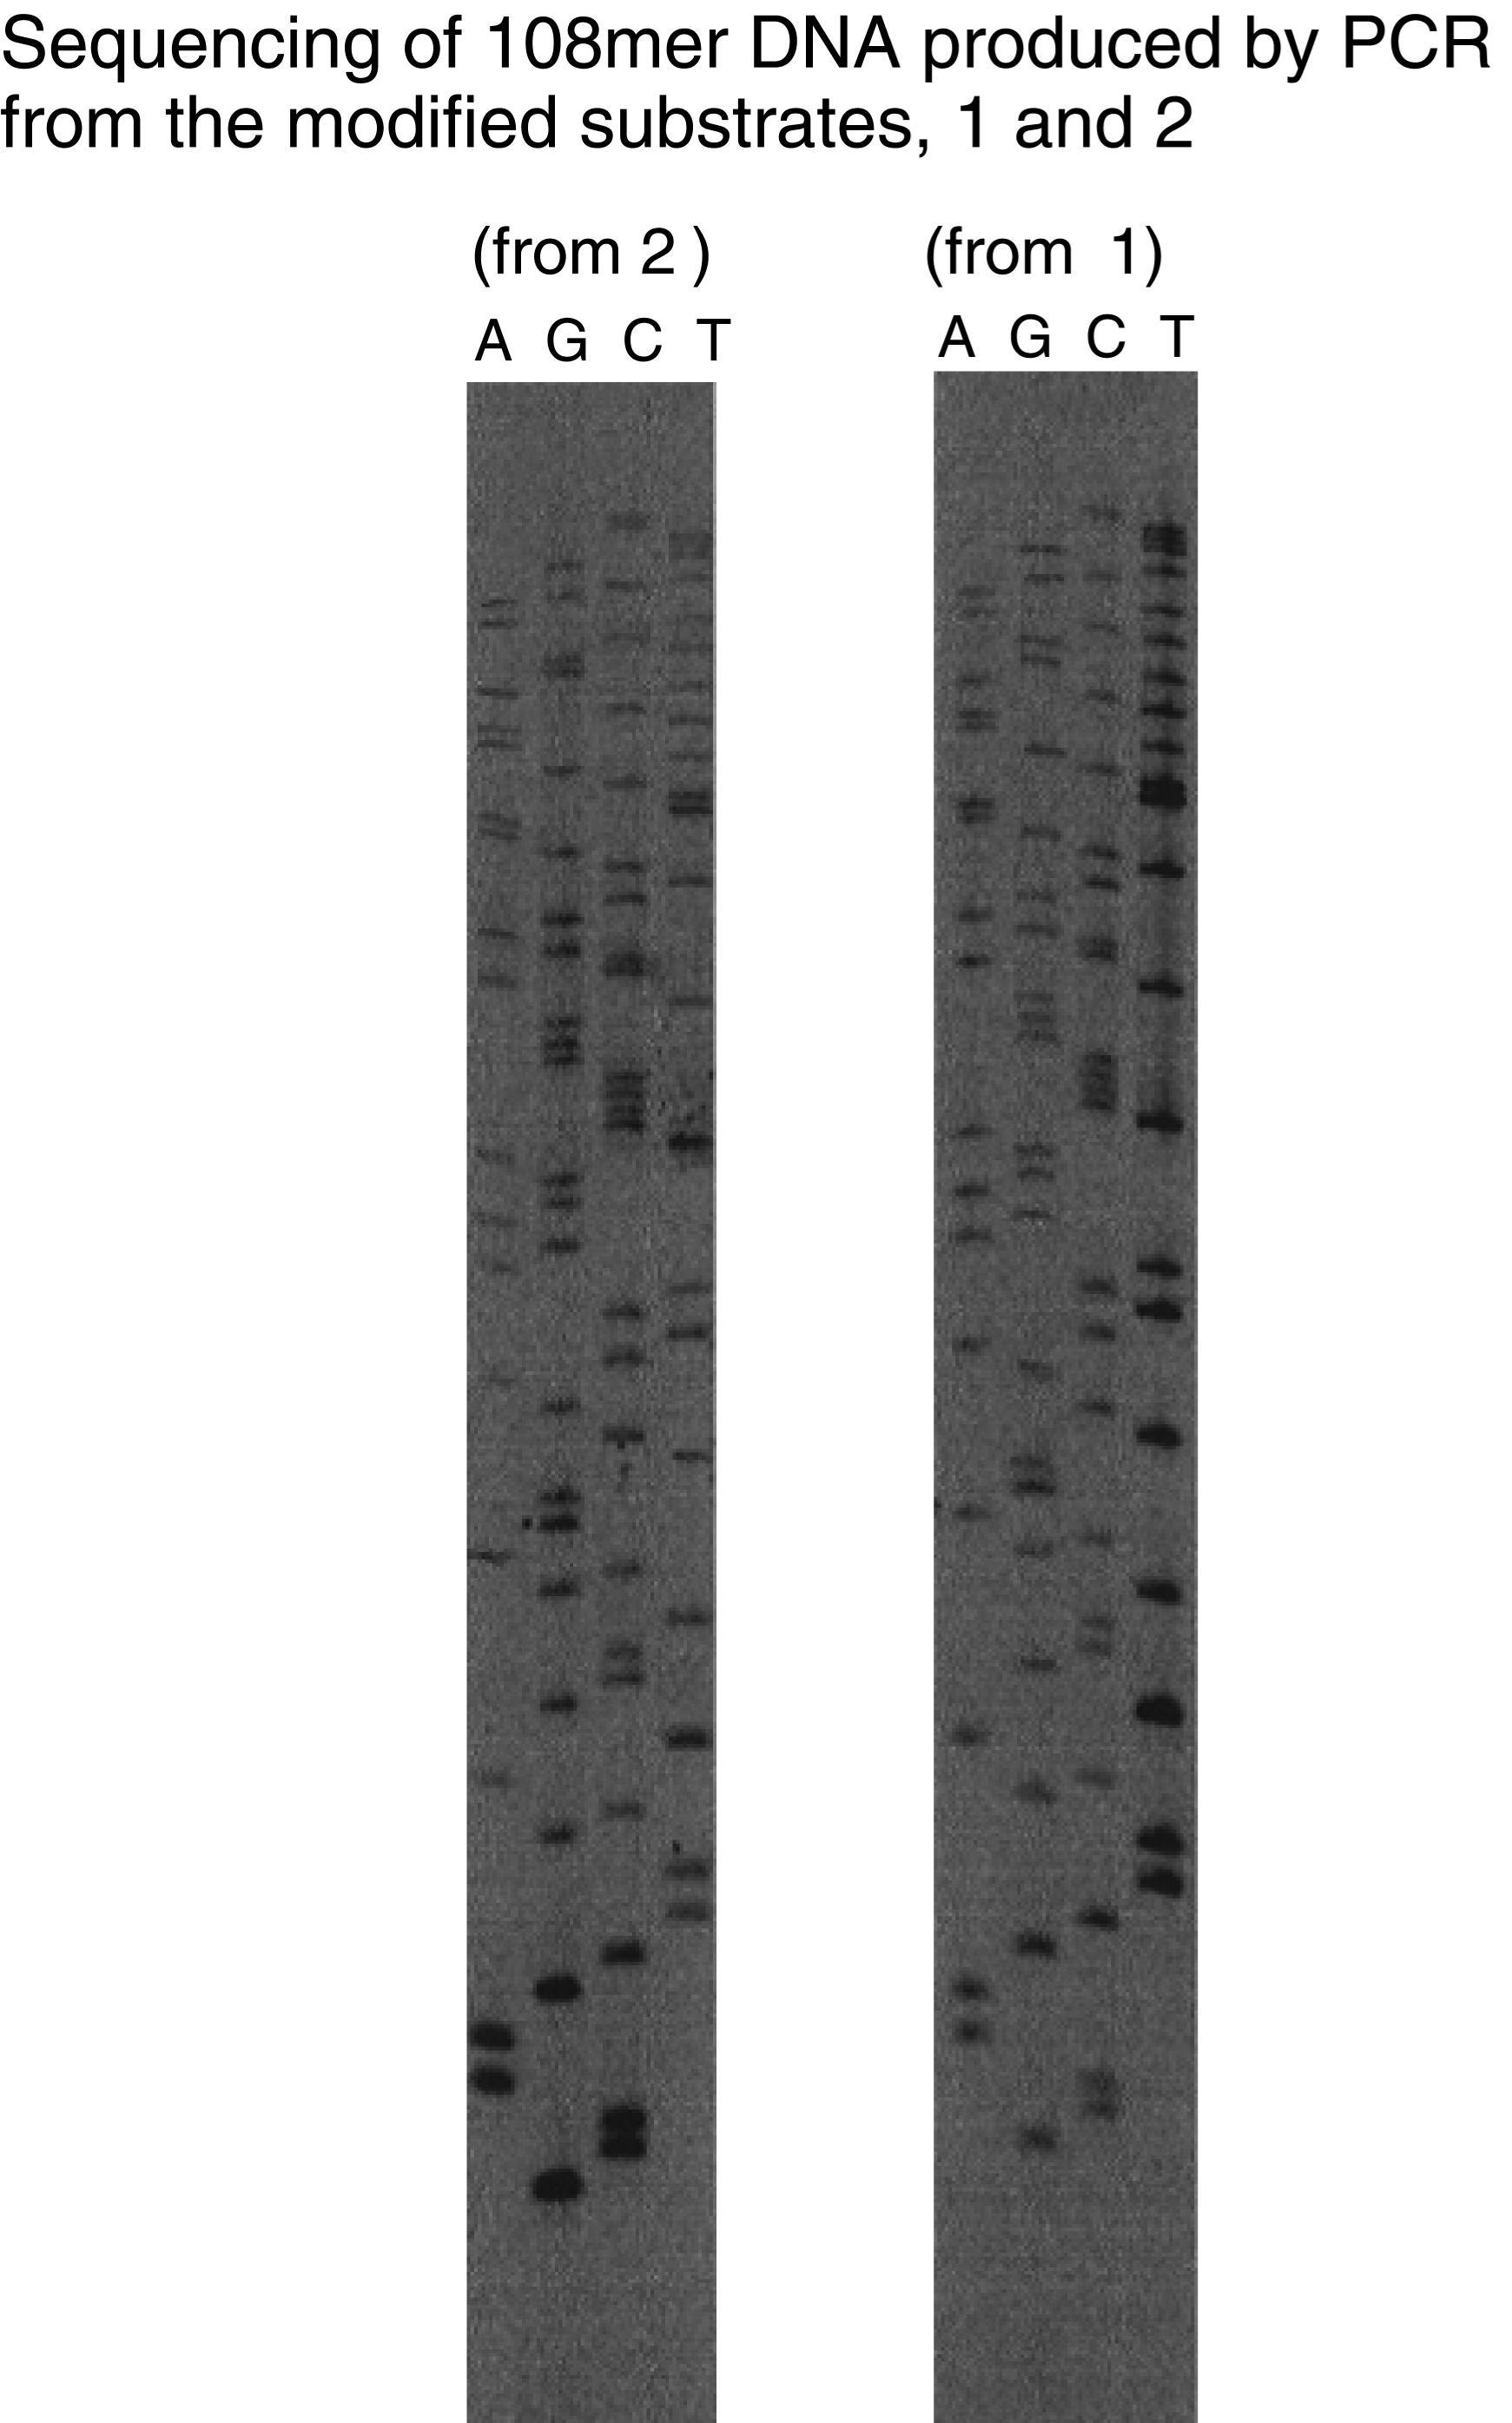

Supplement: b107838k.doc [file b107838k.doc]
